# Supplementary material for: Synthesis of Platinum Nanocrystals Dispersed on Nitrogen-Doped Hierarchically Porous Carbon with Enhanced Oxygen Reduction Reaction Activity and Durability
Source: MDPI journal article supplement (doi:10.3390/nano13030444), 2023-01-21
Supplement: s1 [file s1]

## Supporting Information

### **Preparation of Platinum Nanocrystals Dispersed on the Nitrogen-doped Hierarchical Porous Carbon with Strong Pt-N Interaction to Enhance Oxygen Reduction activity and durability**

*Min Li, Feng Liu, Supeng Pei, Zongshang Zhou, Kai Niu, Jianbo Wu, Yongming Zhang\**

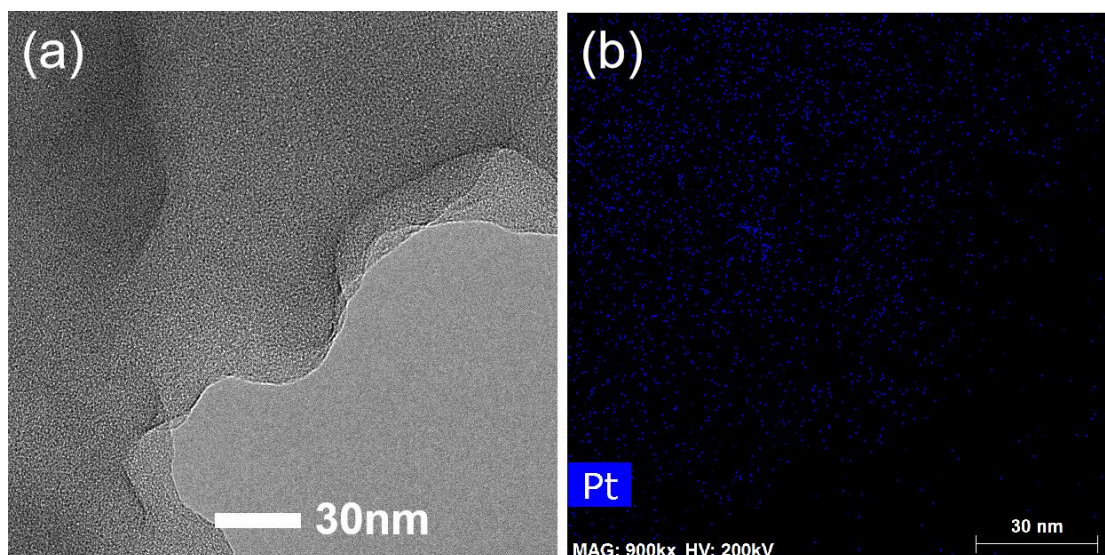

**Figure S1.** TEM image of Pt@Resin(a) and element map of Pt(b)

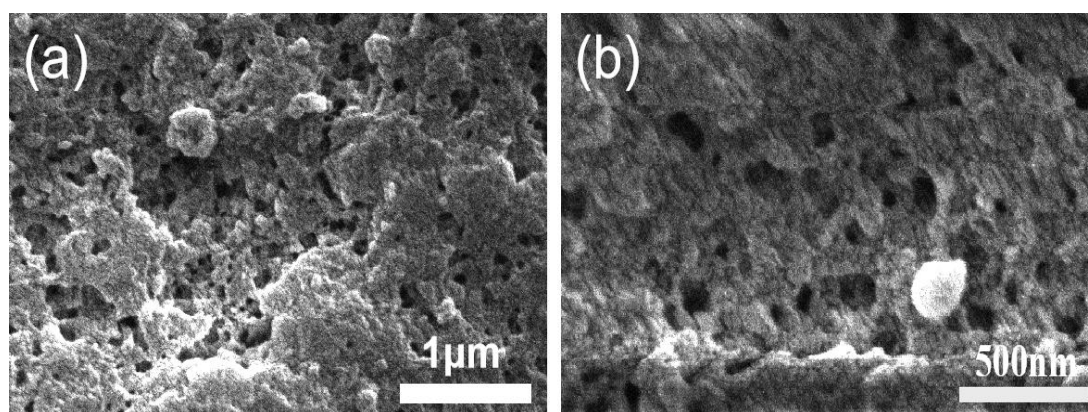

**Figure S2.** (a,b) SEM image of Amberlite Q-PSDB resin

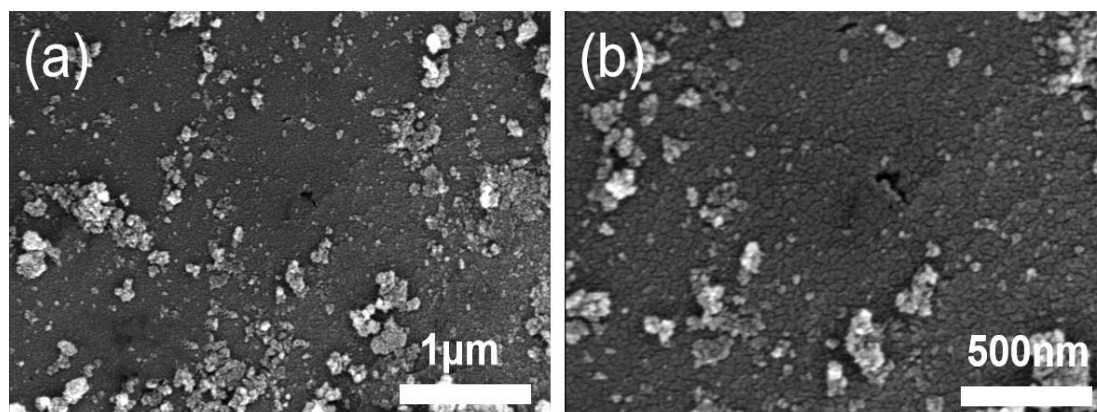

**Figure S3.** (a,b) SEM image of as-prepared Pt/NHPC-800

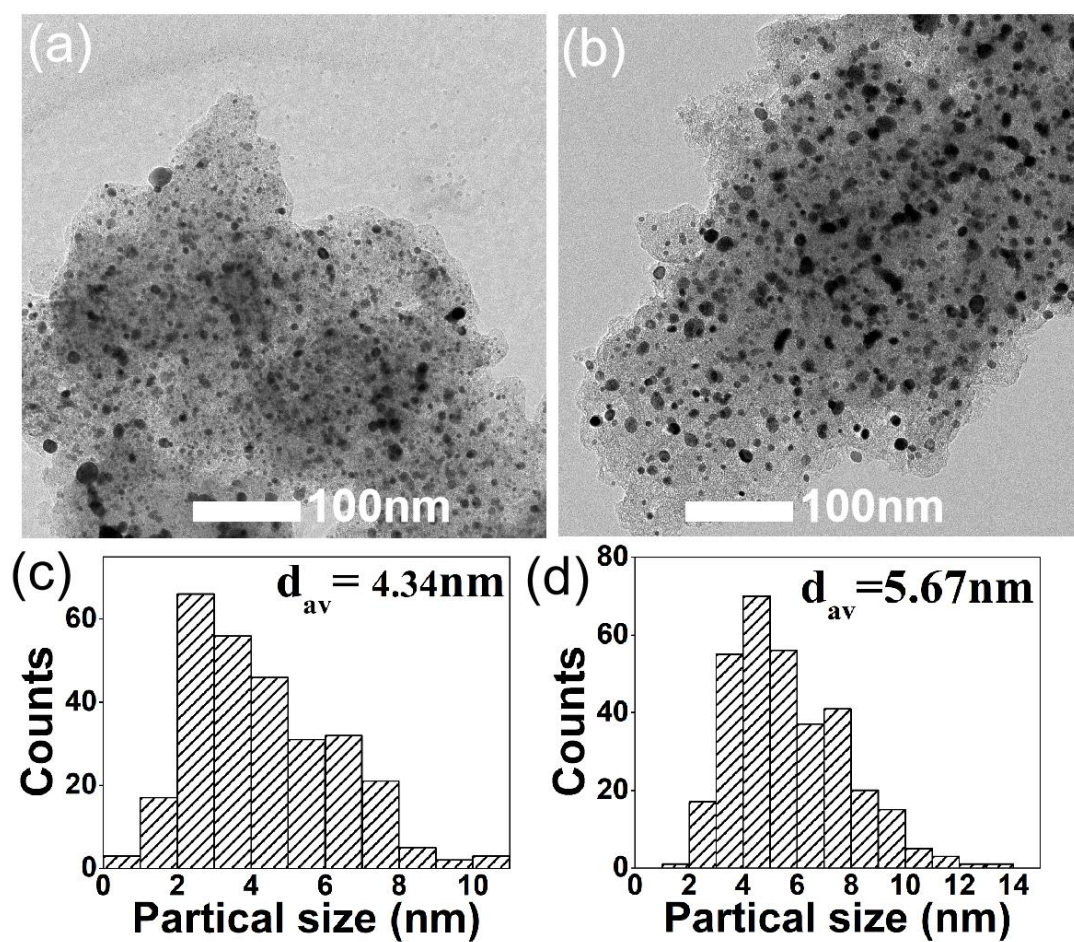

**Figure S4.** TEM images of the (a) Pt/NHPC-700, (b) Pt/NHPC-900 and partical size distribution of the (c) Pt/NHPC-700, (d) Pt/NHPC-900.



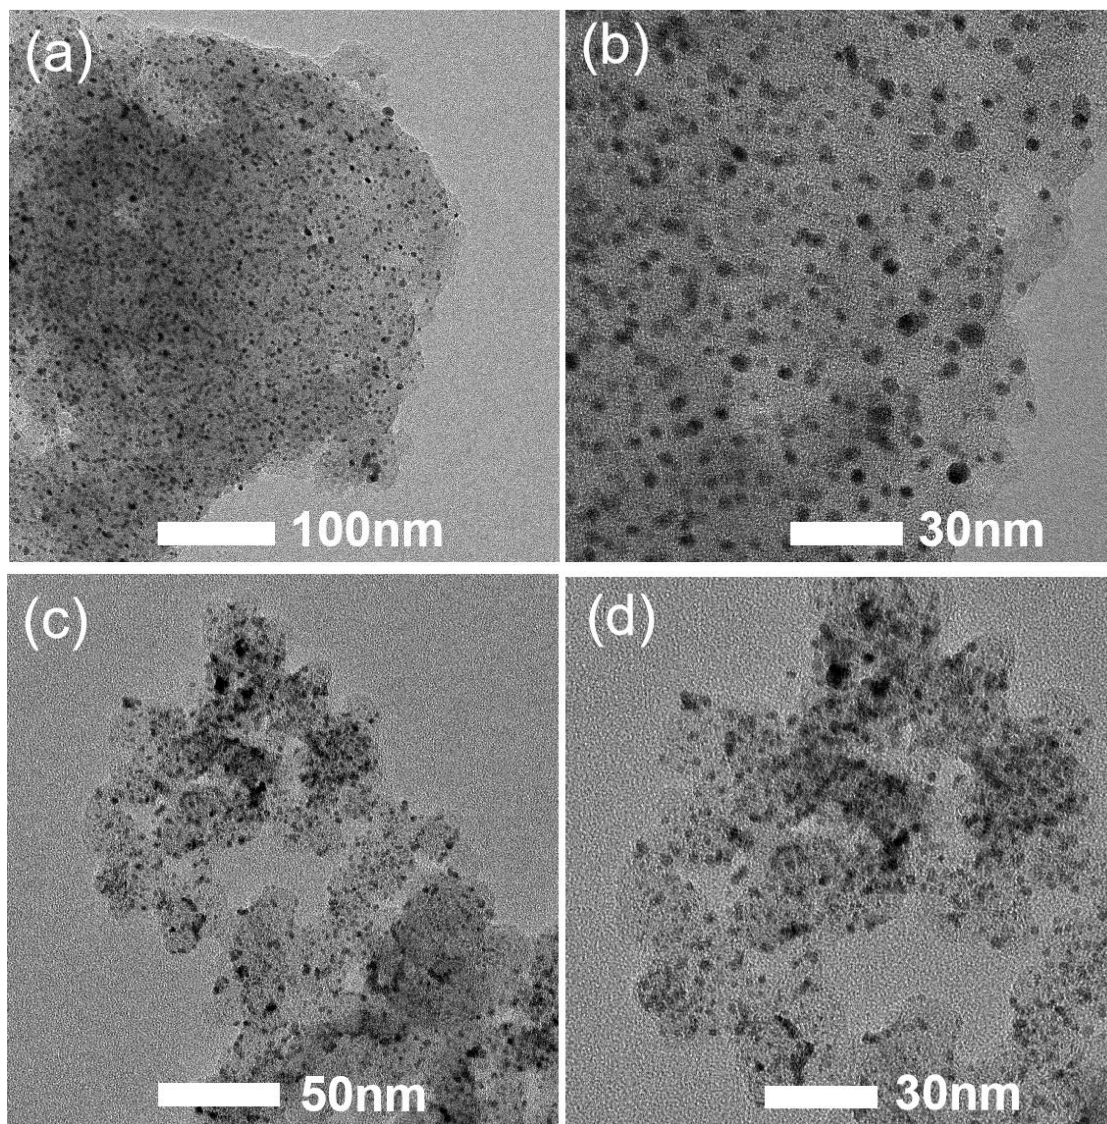

**Figure S5.** TEM image of as-prepared Pt/NHPC-800 (a,b) and the commercial Pt/C (c,d)

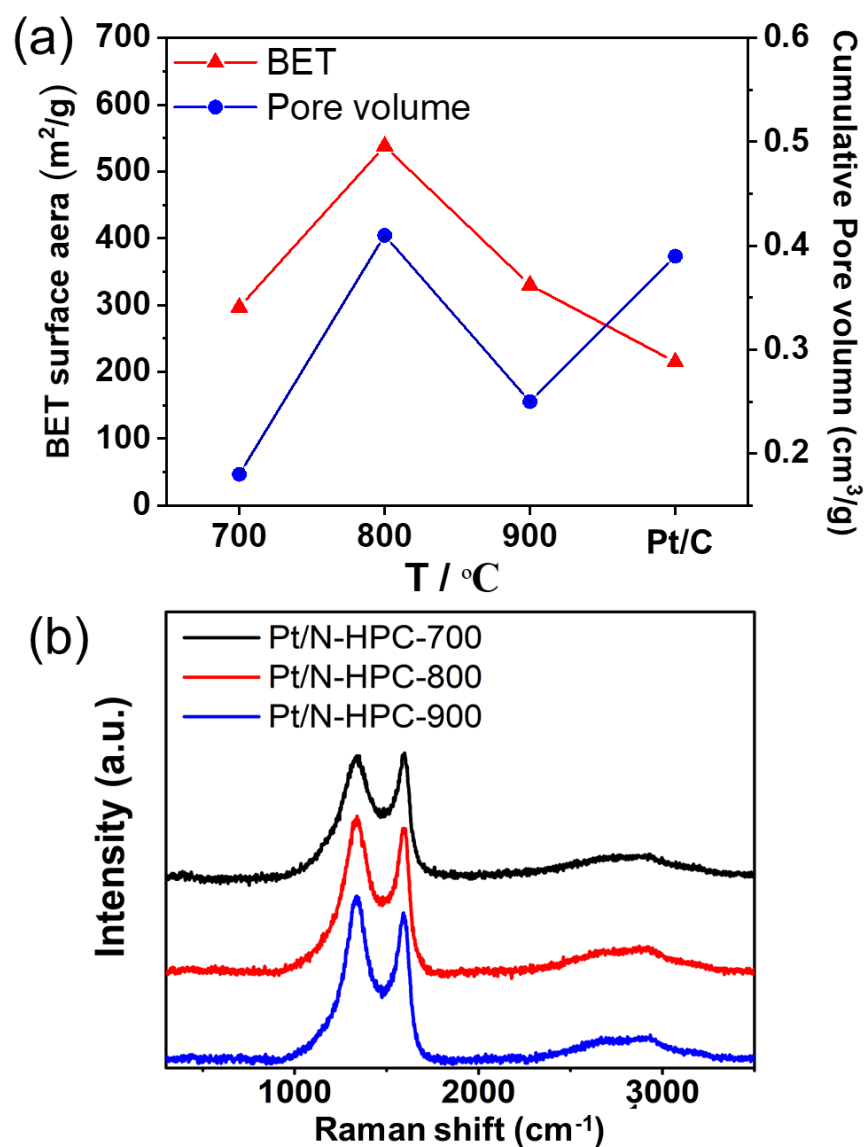

**Figure S6.** (a) Brunauer–Emmett–Teller (BET) surface areas and cumulative pore volumes of the Pt/C and Pt/NHPC-T catalysts (T = 700, 800, and 900 °C). (b) Raman spectrum of Pt/NHPC-T (T = 700, 800, 900 °C).

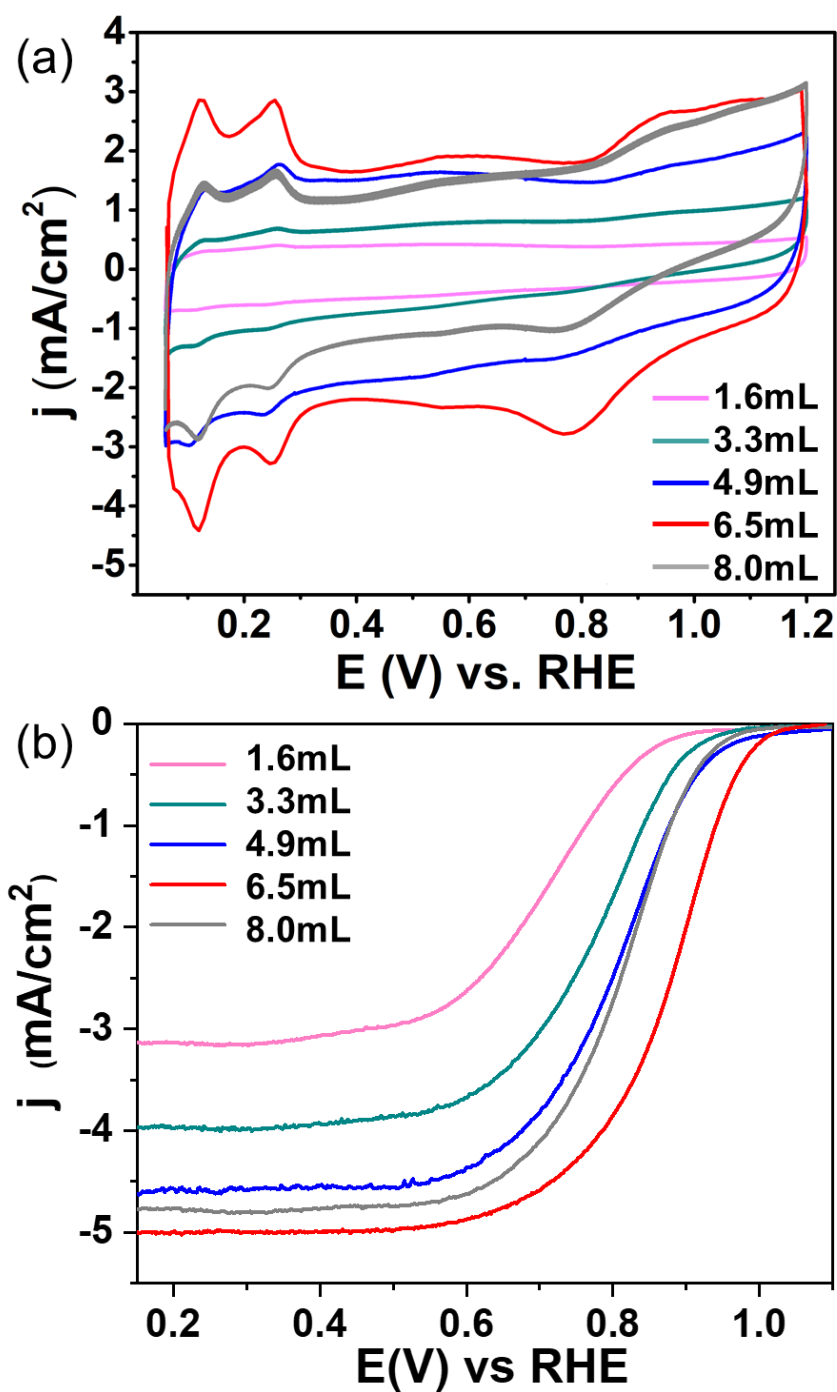

**Figure S7.** Representative ORR performance measurement (a) Cyclic voltammetry (CV) data for x-Pt/NHPC-800 ( $x = 1.6$  mL, 3.3 mL, 4.9 mL, 6.5 mL, 8.0 mL) in N<sub>2</sub>-saturated 0.1 M HClO<sub>4</sub>. (b) RDE polarization curves of x-Pt/NHPC-800 ( $x = 1.6$  mL, 3.3 mL, 4.9 mL, 6.5 mL, 8.0 mL) in O<sub>2</sub>-saturated 0.1 M HClO<sub>4</sub> with a scan rate of 10 mV s<sup>-1</sup> and rotation speed of 1,600 rpm.

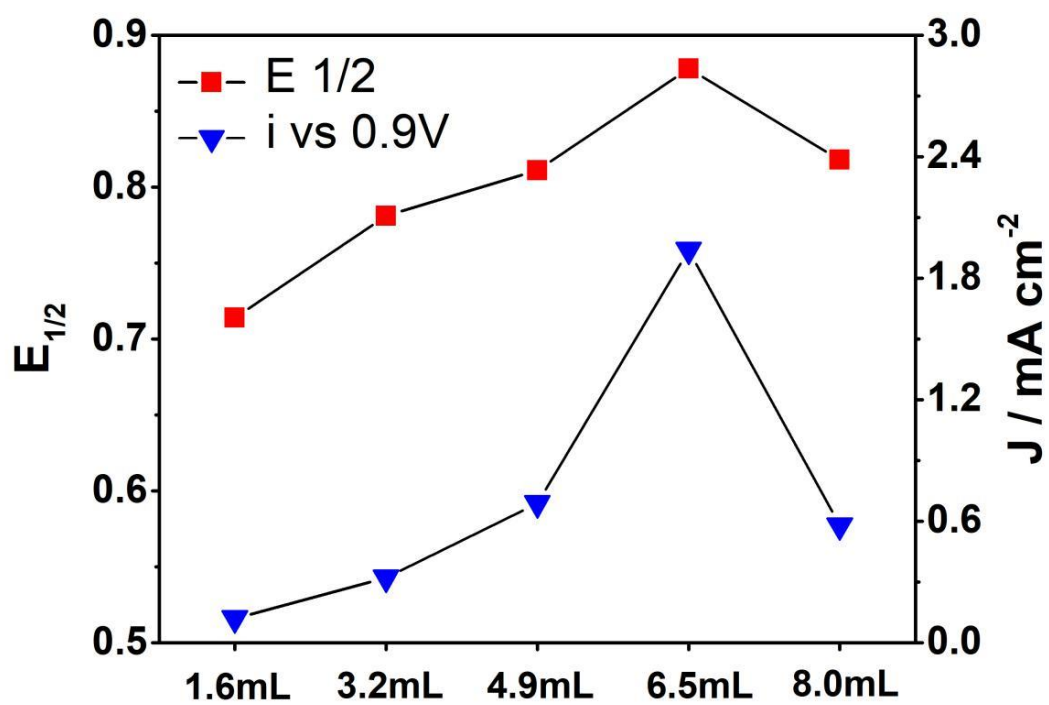

**Figure S8.** Half-wave potential and electric current density at 0.9 V versus RHE for x-Pt/NHPC-800 (x = 1.6 mL, 3.3 mL, 4.9 mL, 6.5 mL, 8.0 mL).

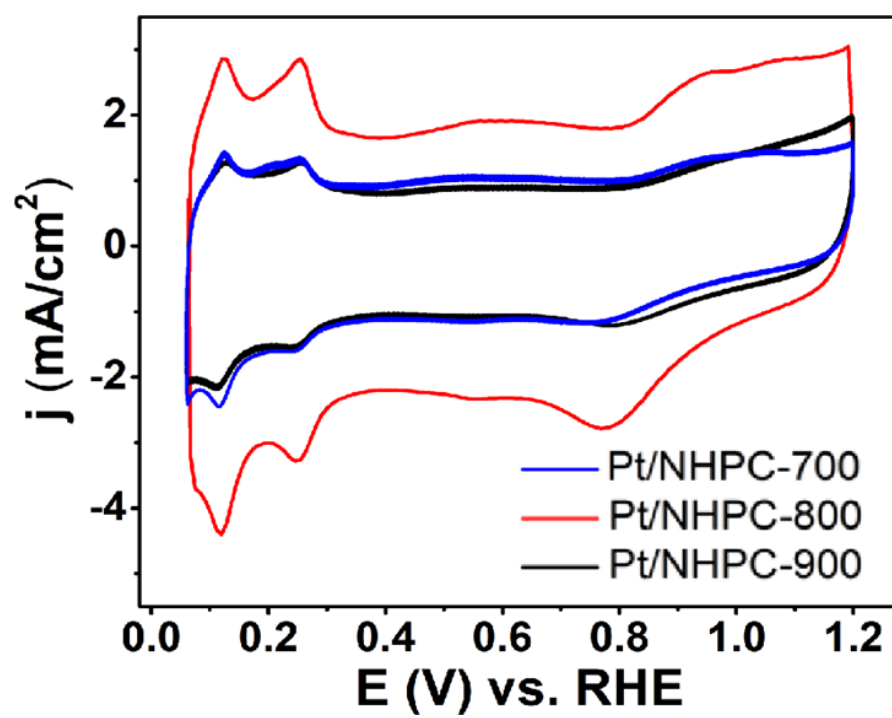

**Figure S9.** The cyclic voltammetry (CV) data for Pt/NHPC-T ( $T = 700, 800, 900$  °C) in  $N_2$ -saturated 0.1 M  $HClO_4$ .



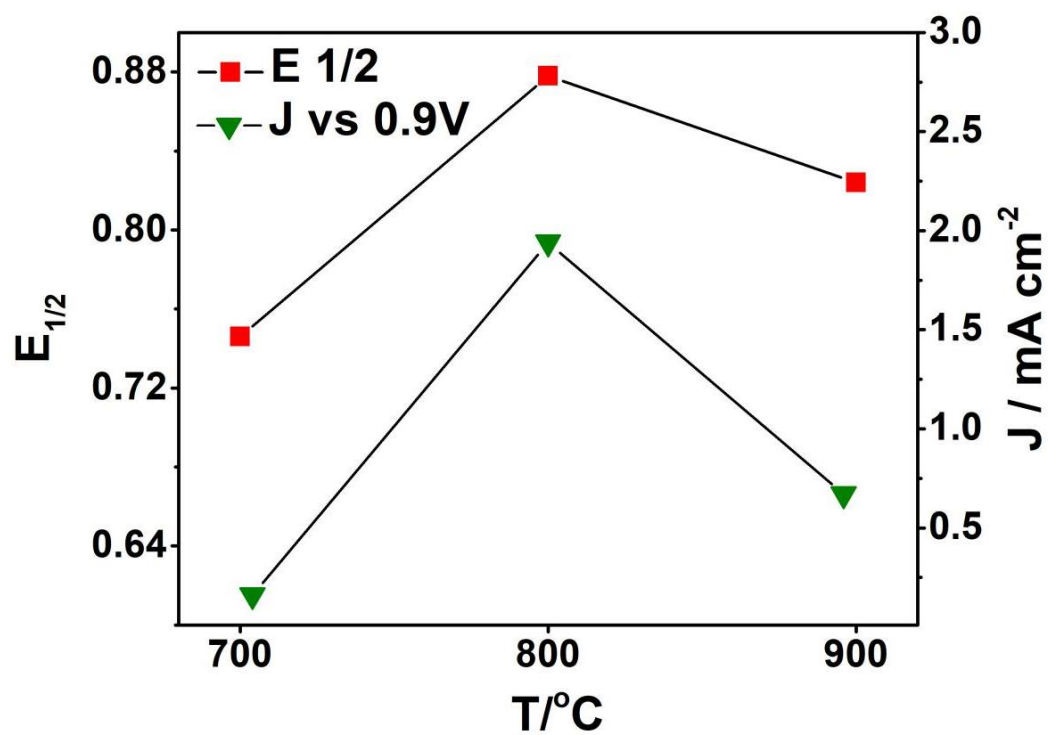

**Figure S10.** Half-wave potential and electric current density at 0.9 V versus RHE for the serial samples of Pt/NHPC-T ( $T = 700, 800, 900$  °C).

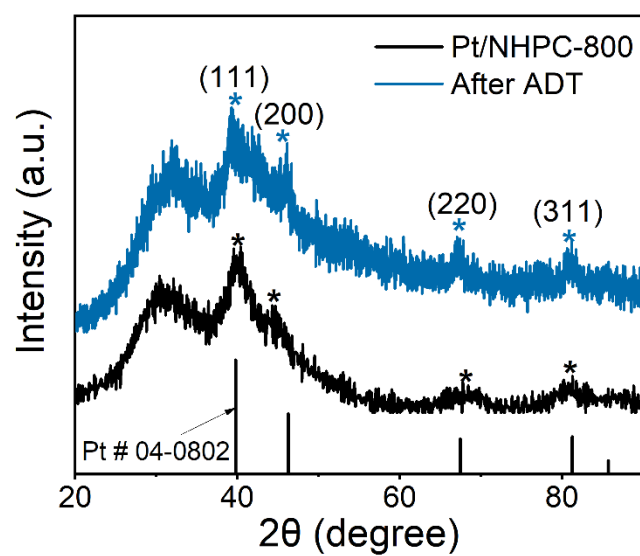

**Figure S11.** XRD pattern of Pt/NHPC-800 before and after ADT.

**Table S1.** Surface composition of Pt/NHPC-700, Pt/NHPC-800, Pt/NHPC-900, calculated from XPS results.

| Sample          | Species concentration (wt %) |       |      |       |
|-----------------|------------------------------|-------|------|-------|
|                 | C                            | O     | N    | Pt    |
| Pt/NHPC-700     | 75.31                        | 11.14 | 2.01 | 11.27 |
| Pt/NHPC-800     | 71.54                        | 7.83  | 3.15 | 17.48 |
| Pt/NHPC-900     | 71.12                        | 8.83  | 1.83 | 18.23 |
| Pt/NHPC-800-ADT | 67.75                        | 13.98 | 3.35 | 14.92 |

**Table S2.** Distribution of each Pt species among Pt/NHPC-700, Pt/NHPC-800, Pt/NHPC-900, Pt/C, and Pt@resin precursors, collected from fitting the Pt 4f XPS spectra results (normalized to the surface Pt atoms of each material).

| Sample          | Species concentration (at. %) |         |         |
|-----------------|-------------------------------|---------|---------|
|                 | Pt (0)                        | Pt (II) | Pt (IV) |
| Pt/NHPC-700     | 20.8                          | 9.9     | 69.3    |
| Pt/NHPC-800     | 62.8                          | 26.8    | 10.4    |
| Pt/NHPC-900     | 66.8                          | 22.4    | 10.8    |
| Pt@resin        | -                             | -       | 100     |
| Pt/C            | 55.7                          | 33.8    | 10.5    |
| Pt/NHPC-800-ADT | 51.5                          | 33.9    | 14.6    |

**Table S3.** The electrochemical performance of the as-prepared Pt/NHPC-700, Pt/NHPC-800, Pt/NHPC-900, and commercial Pt/C.

| Sample                   | ECSA<br>(m <sup>2</sup> g <sup>-1</sup> ) | Specific activity<br>(mA cm <sup>-2</sup> ) | Mass activity<br>(A mg <sub>Pt</sub> <sup>-1</sup> ) | E <sub>1/2</sub><br>(V) |
|--------------------------|-------------------------------------------|---------------------------------------------|------------------------------------------------------|-------------------------|
| Pt/NHPC-700              | 16.9                                      | 0.077                                       | 0.013                                                | 0.746                   |
| Pt/NHPC-800              | 55.2                                      | 0.300                                       | 0.165                                                | 0.878                   |
| Pt/NHPC-900              | 15.8                                      | 0.240                                       | 0.038                                                | 0.824                   |
| Pt/C                     | 96.0                                      | 0.111                                       | 0.107                                                | 0.856                   |
| Pt/NHPC-800<br>After ADT | 54.6                                      | 0.247                                       | 0.135                                                | 0.870                   |
| Pt/C<br>After ADT        | 65.4                                      | 0.092                                       | 0.061                                                | 0.841                   |
